# Supplementary material for: Functional characterization of adaptive variation within a cis-regulatory element influencing Drosophila melanogaster growth
Source: PubMed Central journal article supplement (PMC5783415; doi:10.1371/journal.pbio.2004538), 2018-01-11
Supplement: pbio.2004538.s008.pdf [file pbio.2004538.s008.pdf]

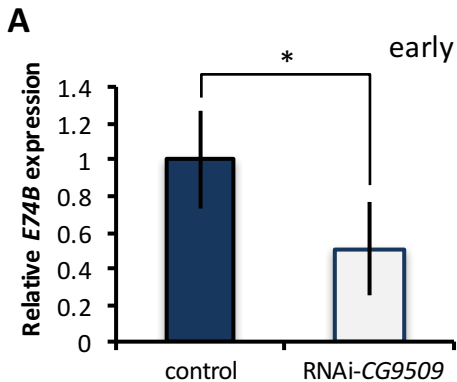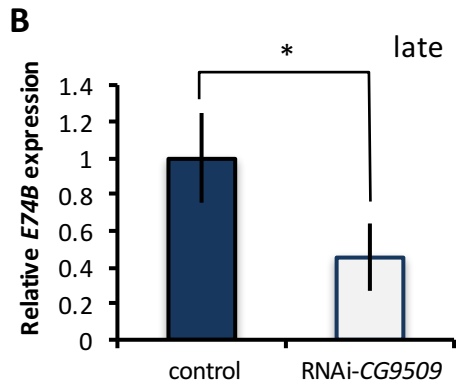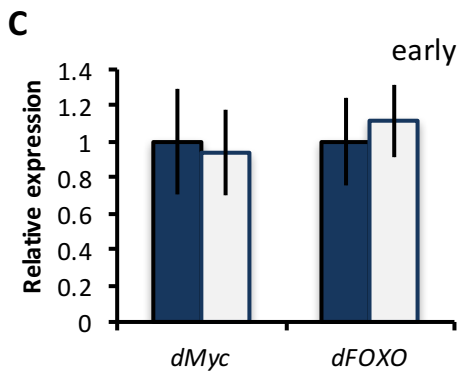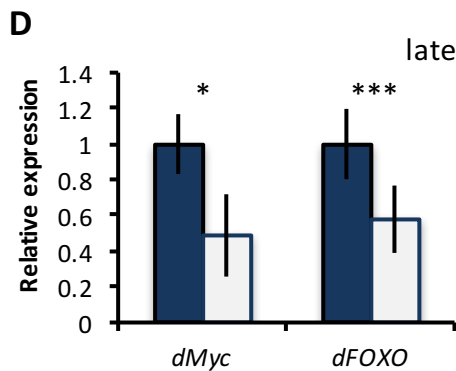

■ control

□ RNAi-*CG9509*
