# Supplementary material for: Functional characterization of adaptive variation within a cis-regulatory element influencing Drosophila melanogaster growth
Source: PubMed Central journal article supplement (PMC5783415; doi:10.1371/journal.pbio.2004538), 2018-01-11
Supplement: pbio.2004538.s010.pdf [file pbio.2004538.s010.pdf]

|                  | $\eta^2_p$ <sup>a</sup> | SS <sup>b</sup> | DF <sup>c</sup> | F-value <sup>d</sup> | P-value <sup>d</sup> |
|------------------|-------------------------|-----------------|-----------------|----------------------|----------------------|
| Sex              | 0.89578                 | 391.7           | 1               | 103.1397             | 3.03E-07             |
| Background       | 0.77204                 | 154.34          | 1               | 40.6407              | 3.53E-05             |
| SNP67            | 0.97531                 | 1800.16         | 1               | 474.012              | 5.17E-11             |
| SNP67:Background | 0.20285                 | 11.6            | 1               | 3.0537               | 0.10607              |
| SNP67:Sex        | 0.51954                 | 49.28           | 1               | 12.9762              | 0.003631             |
| SNP67:SNP765     | 0.55762                 | 57.45           | 2               | 7.5631               | 0.007495             |
| SNP67:SNP115     | 0.44464                 | 36.49           | 1               | 9.6075               | 0.009197             |
| SNP67:Indel      | 0.42118                 | 33.16           | 2               | 4.3659               | 0.037606             |
| SNP67:SNP1063    | 0.12855                 | 6.72            | 2               | 0.885                | 0.437996             |
| SNP67:1174       | 0.62731                 | 76.71           | 1               | 20.1982              | 0.000734             |

<sup>a</sup>Effect size of factor on adult reporter gene expression

<sup>b</sup>Sum of Squares

<sup>c</sup>Degrees of freedom

<sup>d</sup>Determined using ANOVA with sex, background, variant at position 67, and the interaction of the variant at position 67 with background, sex, and the other tested positions
