# Supplementary material for: Functional characterization of adaptive variation within a cis-regulatory element influencing Drosophila melanogaster growth
Source: PubMed Central journal article supplement (PMC5783415; doi:10.1371/journal.pbio.2004538), 2018-01-11
Supplement: pbio.2004538.s011.pdf [file pbio.2004538.s011.pdf]

| TF Model <sup>a</sup> | Sub-Saharan |                    | Cosmopolitan             |                    |                          |
|-----------------------|-------------|--------------------|--------------------------|--------------------|--------------------------|
|                       | SNP         | Score <sup>b</sup> | ln(p-value) <sup>b</sup> | Score <sup>b</sup> | ln(p-value) <sup>b</sup> |
| h                     | 1174        | 7.37               | -9.68                    | -                  | -                        |
| slbo                  | 1174        | 3.74               | -5.52                    | -                  | -                        |
| Trl                   | 1174        | 4.29               | -6.36                    | -                  | -                        |
| twi                   | 1174        | 4.83               | -6.94                    | -                  | -                        |
| ara                   | 1063        | -                  | -                        | 4.79               | -5.45                    |
| br(var.3)             | 1063        | -                  | -                        | 3.58               | -5.41                    |
| br(var.4)             | 1063        | -                  | -                        | 1.44               | -3.68                    |
| caup                  | 1063        | -                  | -                        | 4.18               | -5.24                    |
| Dll                   | 1063        | 3.37               | -5.2                     | 3.04               | -4.93                    |
| fkh                   | 1063        | -                  | -                        | 5.13               | -7.12                    |
| mirr                  | 1063        | -                  | -                        | 5.01               | -6.14                    |
| slp1                  | 1063        | 6.41               | -8.06                    | 5.8                | -7.6                     |
| br(var.2)             | 67          | -                  | -                        | 2.31               | -4.13                    |
| slbo                  | 67          | 4.1                | -5.87                    | -                  | -                        |

<sup>a</sup>Matrix models of predicted transcription factor binding sites were obtained from the JASPAR CORE Insecta database [1].

<sup>b</sup>Score and ln(p-value) were calculated using Patser [2] to survey a representative cosmopolitan and sub-Saharan *CG9509* enhancer sequence (GenBank accession numbers HF913659.1 and HF913717.1).

## References

1. Mathelier A, Fornes O, Arenillas DJ, Chen CY, Denay G, Lee J, et al. JASPAR 2016: a major expansion and update of the open-access database of transcription factor binding profiles. *Nucleic Acids Res.* 2016; 44(D1): D110-5.
2. Hertz GZ, Stormo GD. Identifying DNA and protein patterns with statistically significant alignments of multiple sequences. *Bioinformatics.* 1999; 15(7-8): 563-77.
