# Supplementary material for: Functional characterization of adaptive variation within a cis-regulatory element influencing Drosophila melanogaster growth
Source: PubMed Central journal article supplement (PMC5783415; doi:10.1371/journal.pbio.2004538), 2018-01-11
Supplement: pbio.2004538.s012.pdf [file pbio.2004538.s012.pdf]

| Pos. <sup>a</sup> | Primer pair (5'->3')                                                                | Background <sup>b</sup> | Overlap <sup>c</sup> |
|-------------------|-------------------------------------------------------------------------------------|-------------------------|----------------------|
| 1174              | CGGGCACGCGTTTTAATTACTTTGTAAAGC<br>GTAATTAACGCGTGCCCGAAAAGGCGC                       | Cos.                    | partial              |
| 1174              | GGGCAAGCGTTTTAATTACTTTGTAAAGC<br>GTAATTAACGCTTGCCCAAAAAGGCGC                        | Afr.                    | partial              |
| 1155              | CGGGCAAGCGTTTTAATTACTTTGTAAAGCTGCATTTTTG<br>CAAAAATGCAGCTTAACAAAGTAATTAACGCTTGCCCG  | Cos.                    | full                 |
| 1063              | GCCGTCTTAATGTGTGTTTGTGTGCGAGCCAAGTGC<br>CGACACAAACACACATTAAGACGGCAAAAAAATC          | Cos.                    | partial              |
| 1063              | CTTAATGTTTGTGTTTGTGTGCGAGCCAAGTGC<br>CGACACAAACAAACATTAAGACAGC                      | Afr.                    | partial              |
| 765               | CAATTTTGTATTTTTTAAATCTATGCTTTGATTTTAG<br>GCATAGATTTAAAAATAACAAAATTGTTTTAAATTTTATAAC | Cos.                    | partial              |
| 67                | CGCGACTGGGCCTCAGAGTCAAATAG<br>CTGAGGCCAGTCGCGGCTGAAGATTCGC                          | Afr.                    | partial              |

<sup>a</sup>Position (pos.) in bp before *CG9509* start codon

<sup>b</sup>Mutations were introduced into either a Cosmopolitan (Cos.) or sub-Saharan African background (Afr.).

<sup>c</sup>Overlap indicates degree of primer pair overlap.
