# Supplementary material for: Functional characterization of adaptive variation within a cis-regulatory element influencing Drosophila melanogaster growth
Source: PubMed Central journal article supplement (PMC5783415; doi:10.1371/journal.pbio.2004538), 2018-01-11
Supplement: pbio.2004538.s013.pdf [file pbio.2004538.s013.pdf]

| <b>Genotype<sup>a</sup></b> | <b>Sex</b> | <b>N</b> | <b>Weight<sup>b</sup> (mg) ± SEM</b> |
|-----------------------------|------------|----------|--------------------------------------|
| H/H                         | female     | 14       | 1.6743 ± 0.0401                      |
| H/WT                        | female     | 22       | 1.6700 ± 0.0418                      |
| WT/WT                       | female     | 10       | 1.5940 ± 0.0551                      |
| H                           | male       | 25       | 1.3652 ± 0.0233                      |
| WT                          | male       | 19       | 1.2937 ± 0.0285                      |

<sup>a</sup>*CG9509* genotype in F2 offspring of a cross between flies carrying a hypomorph allele (H) or a wild-type allele (WT). Males are hemizygous and carry only one copy.

<sup>b</sup>Effect of *CG9509* allele on adult body weight:  $P = 0.0373$ ,  $\eta^2_p = 0.049$ . Significance assessed using an ANOVA with allele and sex as factors.
