# Supplementary material for: Functional characterization of adaptive variation within a cis-regulatory element influencing Drosophila melanogaster growth
Source: PubMed Central journal article supplement (PMC5783415; doi:10.1371/journal.pbio.2004538), 2018-01-11
Supplement: pbio.2004538.s014.pdf [file pbio.2004538.s014.pdf]

| Pos. <sup>a</sup> | Dist. <sup>b</sup> | $r^{2c}$ | P-value <sup>d</sup> | Pos. <sup>a</sup> | Dist. <sup>b</sup> | $r^{2c}$ | P-value <sup>d</sup> |
|-------------------|--------------------|----------|----------------------|-------------------|--------------------|----------|----------------------|
| 26082             | 24969              | 0.312481 | 0.182                | 35838             | 15213              | 0.001849 | 1                    |
| 26323             | 24728              | 0.266256 | 0.182                | 35955             | 15096              | 0.001849 | 1                    |
| 37940             | 13111              | 0.312481 | 0.182                | 36050             | 15001              | 0.01     | 1                    |
| 39435             | 11616              | 0.218089 | 0.242                | 37781             | 13270              | 0.01     | 1                    |
| 39667             | 11384              | 0.218089 | 0.242                | 38183             | 12868              | 0.01     | 1                    |
| 39680             | 11371              | 0.201601 | 0.242                | 38206             | 12845              | 0.01     | 1                    |
| 39697             | 11354              | 0.218089 | 0.242                | 38335             | 12716              | 0.01     | 1                    |
| 39720             | 11331              | 0.218089 | 0.242                | 38444             | 12607              | 0.01     | 1                    |
| 39835             | 11216              | 0.218089 | 0.242                | 38728             | 12323              | 0.001849 | 1                    |
| 40429             | 10622              | 0.201601 | 0.242                | 38998             | 12053              | 0.004761 | 1                    |
| 41594             | 9457               | 0.218089 | 0.242                | 39307             | 11744              | 0.022201 | 1                    |
| 41811             | 9240               | 0.218089 | 0.242                | 39311             | 11740              | 0.001849 | 1                    |
| 42545             | 8506               | 0.218089 | 0.242                | 40110             | 10941              | 0.001849 | 1                    |
| 42730             | 8321               | 0.201601 | 0.242                | 40351             | 10700              | 0.001849 | 1                    |
| 42893             | 8158               | 0.201601 | 0.242                | 40361             | 10690              | 0.001849 | 1                    |
| 43817             | 7234               | 0.218089 | 0.242                | 40362             | 10689              | 0.001849 | 1                    |
| 43867             | 7184               | 0.218089 | 0.242                | 40376             | 10675              | 0.001849 | 1                    |
| 43885             | 7166               | 0.218089 | 0.242                | 40967             | 10084              | 0.001849 | 1                    |
| 43953             | 7098               | 0.218089 | 0.242                | 41431             | 9620               | 0.001849 | 1                    |
| 44130             | 6921               | 0.201601 | 0.242                | 42828             | 8223               | 0.022201 | 1                    |
| 44193             | 6858               | 0.201601 | 0.242                | 42874             | 8177               | 0.022201 | 1                    |
| 44333             | 6718               | 0.201601 | 0.242                | 43215             | 7836               | 0.001849 | 1                    |
| 44676             | 6375               | 0.201601 | 0.242                | 44993             | 6058               | 0.001849 | 1                    |
| 46488             | 4563               | 0.201601 | 0.242                | 45133             | 5918               | 0.001849 | 1                    |
| 47759             | 3292               | 0.201601 | 0.242                | 45153             | 5898               | 0.001849 | 1                    |
| 47780             | 3271               | 0.201601 | 0.242                | 45221             | 5830               | 0.001849 | 1                    |
| 26399             | 24652              | 0.1849   | 0.455                | 45242             | 5809               | 0.001849 | 1                    |
| 26475             | 24576              | 0.1849   | 0.455                | 45244             | 5807               | 0.001849 | 1                    |
| 26478             | 24573              | 0.1849   | 0.455                | 45354             | 5697               | 0.001849 | 1                    |
| 26480             | 24571              | 0.1849   | 0.455                | 45355             | 5696               | 0.001849 | 1                    |
| 26500             | 24551              | 0.1849   | 0.455                | 45402             | 5649               | 0.001849 | 1                    |
| 26544             | 24507              | 0.1849   | 0.455                | 45587             | 5464               | 0.004761 | 1                    |
| 26581             | 24470              | 0.1849   | 0.455                | 45809             | 5242               | 0.01     | 1                    |
| 26582             | 24469              | 0.1849   | 0.455                | 45904             | 5147               | 0.004761 | 1                    |
| 29279             | 21772              | 0.1849   | 0.455                | 45905             | 5146               | 0.004761 | 1                    |
| 37921             | 13130              | 0.1849   | 0.455                | 45931             | 5120               | 0.004761 | 1                    |
| 38537             | 12514              | 0.1849   | 0.455                | 45937             | 5114               | 0.004761 | 1                    |
| 38575             | 12476              | 0.1849   | 0.455                | 45963             | 5088               | 0.004761 | 1                    |
| 39178             | 11873              | 0.1849   | 0.455                | 46269             | 4782               | 0.004761 | 1                    |
| 41194             | 9857               | 0.1849   | 0.455                | 46272             | 4779               | 0.004761 | 1                    |
| 41269             | 9782               | 0.1849   | 0.455                | 46314             | 4737               | 0.004761 | 1                    |
| 41297             | 9754               | 0.1849   | 0.455                | 48021             | 3030               | 0.022201 | 1                    |

|       |       |          |       |       |      |          |       |
|-------|-------|----------|-------|-------|------|----------|-------|
| 41304 | 9747  | 0.1849   | 0.455 | 49375 | 1676 | 0.01     | 1     |
| 41369 | 9682  | 0.1849   | 0.455 | 49485 | 1566 | 0.022201 | 1     |
| 41378 | 9673  | 0.1849   | 0.455 | 49617 | 1434 | 0.01     | 1     |
| 41381 | 9670  | 0.1849   | 0.455 | 50016 | 1035 | 0.01     | 1     |
| 42178 | 8873  | 0.1849   | 0.455 | 50046 | 1005 | 0.01     | 1     |
| 49329 | 1722  | 0.1849   | 0.455 | 50195 | 856  | 0.01     | 1     |
| 27248 | 23803 | 0.096721 | 0.545 | 50347 | 704  | 0.001849 | 1     |
| 27259 | 23792 | 0.096721 | 0.545 | 50612 | 439  | 0.001849 | 1     |
| 27400 | 23651 | 0.096721 | 0.545 | 52971 | 1920 | 0.001849 | 1     |
| 27405 | 23646 | 0.096721 | 0.545 | 53590 | 2539 | 0.266256 | 0.182 |
| 27452 | 23599 | 0.096721 | 0.545 | 53703 | 2652 | 0.266256 | 0.182 |
| 27459 | 23592 | 0.096721 | 0.545 | 53741 | 2690 | 0.266256 | 0.182 |
| 27486 | 23565 | 0.096721 | 0.545 | 53764 | 2713 | 0.266256 | 0.182 |
| 27511 | 23540 | 0.096721 | 0.545 | 54066 | 3015 | 0.004761 | 1     |
| 27586 | 23465 | 0.096721 | 0.545 | 54198 | 3147 | 0.068121 | 0.545 |
| 27707 | 23344 | 0.096721 | 0.545 | 54222 | 3171 | 0.266256 | 0.182 |
| 27944 | 23107 | 0.096721 | 0.545 | 54300 | 3249 | 0.266256 | 0.182 |
| 28105 | 22946 | 0.096721 | 0.545 | 54444 | 3393 | 0.068121 | 0.545 |
| 28494 | 22557 | 0.096721 | 0.545 | 54501 | 3450 | 0.266256 | 0.182 |
| 28802 | 22249 | 0.096721 | 0.545 | 54504 | 3453 | 0.266256 | 0.182 |
| 28916 | 22135 | 0.096721 | 0.545 | 54837 | 3786 | 0.071289 | 0.567 |
| 29135 | 21916 | 0.096721 | 0.545 | 54843 | 3792 | 0.004761 | 1     |
| 29516 | 21535 | 0.096721 | 0.545 | 54906 | 3855 | 0.266256 | 0.182 |
| 40711 | 10340 | 0.096721 | 0.545 | 54966 | 3915 | 0.266256 | 0.182 |
| 41685 | 9366  | 0.096721 | 0.545 | 54969 | 3918 | 0.266256 | 0.182 |
| 42107 | 8944  | 0.096721 | 0.545 | 55035 | 3984 | 0.266256 | 0.182 |
| 42124 | 8927  | 0.096721 | 0.545 | 55092 | 4041 | 0.004761 | 1     |
| 42637 | 8414  | 0.096721 | 0.545 | 55193 | 4142 | 0.266256 | 0.182 |
| 42969 | 8082  | 0.096721 | 0.545 | 55643 | 4592 | 0.096721 | 0.545 |
| 42980 | 8071  | 0.096721 | 0.545 | 55670 | 4619 | 0.218089 | 0.242 |
| 42984 | 8067  | 0.096721 | 0.545 | 55682 | 4631 | 0.201601 | 0.242 |
| 43017 | 8034  | 0.096721 | 0.545 | 55854 | 4803 | 0.312481 | 0.182 |
| 43136 | 7915  | 0.096721 | 0.545 | 55878 | 4827 | 0.312481 | 0.182 |
| 49167 | 1884  | 0.096721 | 0.545 | 55941 | 4890 | 0.4761   | 0.061 |
| 40689 | 10362 | 0.071289 | 0.567 | 55955 | 4904 | 0.4761   | 0.061 |
| 40690 | 10361 | 0.071289 | 0.567 | 55962 | 4911 | 0.4761   | 0.061 |
| 40975 | 10076 | 0.071289 | 0.567 | 55992 | 4941 | 0.4761   | 0.061 |
| 41316 | 9735  | 0.071289 | 0.567 | 55997 | 4946 | 0.4761   | 0.061 |
| 41317 | 9734  | 0.071289 | 0.567 | 56012 | 4961 | 0.312481 | 0.182 |
| 44514 | 6537  | 0.071289 | 0.567 | 56081 | 5030 | 0.312481 | 0.182 |
| 46029 | 5022  | 0.071289 | 0.567 | 56146 | 5095 | 0.4761   | 0.061 |
| 46095 | 4956  | 0.071289 | 0.567 | 56258 | 5207 | 0.201601 | 0.242 |
| 27608 | 23443 | 0.022201 | 1     | 56445 | 5394 | 0.450241 | 0.061 |
| 29759 | 21292 | 0.022201 | 1     | 58880 | 7829 | 0.266256 | 0.182 |

|       |       |          |   |       |       |          |       |
|-------|-------|----------|---|-------|-------|----------|-------|
| 29795 | 21256 | 0.022201 | 1 | 59077 | 8026  | 0.001849 | 1     |
| 30033 | 21018 | 0.001849 | 1 | 59327 | 8276  | 0.068121 | 0.545 |
| 30088 | 20963 | 0.022201 | 1 | 59366 | 8315  | 0.004761 | 1     |
| 30155 | 20896 | 0.022201 | 1 | 59624 | 8573  | 0.001849 | 1     |
| 30159 | 20892 | 0.022201 | 1 | 59648 | 8597  | 0.001849 | 1     |
| 30194 | 20857 | 0.022201 | 1 | 59924 | 8873  | 0.096721 | 0.545 |
| 30224 | 20827 | 0.022201 | 1 | 59927 | 8876  | 0.096721 | 0.545 |
| 30359 | 20692 | 0.022201 | 1 | 60083 | 9032  | 0.1849   | 0.455 |
| 30828 | 20223 | 0.022201 | 1 | 60098 | 9047  | 0.1849   | 0.455 |
| 31511 | 19540 | 0.004761 | 1 | 60171 | 9120  | 0.1849   | 0.455 |
| 31585 | 19466 | 0.004761 | 1 | 60185 | 9134  | 0.1849   | 0.455 |
| 31811 | 19240 | 0.01     | 1 | 60885 | 9834  | 0.001849 | 1     |
| 32248 | 18803 | 0.01     | 1 | 63896 | 12845 | 0.1849   | 0.455 |
| 32250 | 18801 | 0.01     | 1 | 65500 | 14449 | 0.071289 | 0.567 |
| 32590 | 18461 | 0.001849 | 1 | 65533 | 14482 | 0.1849   | 0.455 |
| 32713 | 18338 | 0.01     | 1 | 65563 | 14512 | 0.001849 | 1     |
| 32981 | 18070 | 0.001849 | 1 | 65837 | 14786 | 0.001849 | 1     |
| 32988 | 18063 | 0.001849 | 1 | 65933 | 14882 | 0.001849 | 1     |
| 33303 | 17748 | 0.022201 | 1 | 66018 | 14967 | 0.1849   | 0.455 |
| 33443 | 17608 | 0.022201 | 1 | 66829 | 15778 | 0.001849 | 1     |
| 33729 | 17322 | 0.001849 | 1 | 68040 | 16989 | 0.266256 | 0.182 |
| 33735 | 17316 | 0.001849 | 1 | 68063 | 17012 | 0.266256 | 0.182 |
| 33737 | 17314 | 0.001849 | 1 | 74995 | 23944 | 0.004761 | 1     |
| 33774 | 17277 | 0.001849 | 1 | 75115 | 24064 | 0.1849   | 0.455 |
| 34564 | 16487 | 0.01     | 1 | 75146 | 24095 | 0.1849   | 0.455 |
| 35029 | 16022 | 0.01     | 1 | 75161 | 24110 | 0.1849   | 0.455 |
| 35051 | 16000 | 0.01     | 1 | 75186 | 24135 | 0.1849   | 0.455 |
| 35301 | 15750 | 0.001849 | 1 | 75315 | 24264 | 0.096721 | 0.545 |
| 35817 | 15234 | 0.001849 | 1 | 75713 | 24662 | 0.096721 | 0.545 |

<sup>a</sup>Position (pos.) in alignment. Dutch full genome sequences are described in [1] and available from <http://evol.bio.lmu.de/downloads/>.

<sup>b</sup>Distance (dist.) from position 67 in *CG9509* enhancer in base pairs

<sup>c</sup>The degree of linkage disequilibrium,  $r^2$  [2], between position 67 and the indicated position. All polymorphic sites, excluding singletons, within a 50 kb region centered around position 67 are listed.

## References

1. Voigt S, Laurent S, Litovchenko M, Stephan W. Positive Selection at the *Polyhomeotic* Locus Led to Decreased Thermosensitivity of Gene Expression in Temperate *Drosophila melanogaster*. *Genetics*. 2015; 200(2): 591-9.
2. Lewontin RC. The interaction of selection and linkage. II. Optimum models. *Genetics*. 1964; 50: 757-82.
