# Supplementary material for: Functional characterization of adaptive variation within a cis-regulatory element influencing Drosophila melanogaster growth
Source: PubMed Central journal article supplement (PMC5783415; doi:10.1371/journal.pbio.2004538), 2018-01-11
Supplement: pbio.2004538.s015.pdf [file pbio.2004538.s015.pdf]

| Pos. <sup>a</sup> | Genotype <sup>b</sup> | Sex <sup>c</sup> | N <sup>d</sup> | N <sub>wing</sub> <sup>e</sup> |
|-------------------|-----------------------|------------------|----------------|--------------------------------|
| 67                | G/G                   | F                | 13             | 11                             |
| 67                | G/C                   | F                | 24             | 24                             |
| 67                | C/C                   | F                | 13             | 13                             |
| 67                | G                     | M                | 27             | 24                             |
| 67                | C                     | M                | 23             | 21                             |
| 1174 & 1063       | AT/AT                 | F                | 29             | 29                             |
| 1174 & 1063       | CG/CG                 | F                | 35             | 35                             |
| 1174 & 1063       | AT                    | M                | 28             | 27                             |
| 1174 & 1063       | CG                    | M                | 34             | 32                             |

<sup>a</sup>Position (pos.) of interest in *CG9509* enhancer

<sup>b</sup>Genotype at position of interest

<sup>c</sup>Male (M) or female (F)

<sup>d</sup>Number of flies for which body weight was measured

<sup>e</sup>Number of flies for which wing size and wing loading was measured
