# Supplementary material for: Functional characterization of adaptive variation within a cis-regulatory element influencing Drosophila melanogaster growth
Source: PLoS Biol. 2018 Jan 11;16(1):e2004538. doi: 10.1371/journal.pbio.2004538 (PMC5783415; doi:10.1371/journal.pbio.2004538)
Supplement: S2 Data — (XLSX) [file pbio.2004538.s002.xlsx]

## Sheet: FigS3A
Replicate	Strain	Sex	DDT Conc (µg/cm2)	Flies (start)	Mortality (2 hours)
1	control	F	0	11	0
2	control	F	0	10	0
1	control	F	0.25	20	0
2	control	F	0.25	20	1
3	control	F	0.25	20	2
4	control	F	0.25	20	1
5	control	F	0.25	20	0
6	control	F	0.25	20	2
7	control	F	0.25	20	2
1	RNAi-CG9509	F	0.25	20	1
2	RNAi-CG9509	F	0.25	20	1
3	RNAi-CG9509	F	0.25	20	0
4	RNAi-CG9509	F	0.25	20	0
5	RNAi-CG9509	F	0.25	20	0
6	RNAi-CG9509	F	0.25	20	0
1	control	F	0.5	20	3
2	control	F	0.5	20	3
3	control	F	0.5	20	1
4	control	F	0.5	20	4
5	control	F	0.5	20	1
6	control	F	0.5	20	1
1	RNAi-CG9509	F	0.5	20	3
2	RNAi-CG9509	F	0.5	20	2
3	RNAi-CG9509	F	0.5	20	0
4	RNAi-CG9509	F	0.5	20	3
5	RNAi-CG9509	F	0.5	20	0
6	RNAi-CG9509	F	0.5	20	1
1	control	F	0.75	20	3
2	control	F	0.75	19	3
3	control	F	0.75	14	4
4	control	F	0.75	20	6
5	control	F	0.75	20	8
6	control	F	0.75	20	4
1	RNAi-CG9509	F	0.75	20	3
2	RNAi-CG9509	F	0.75	20	3
3	RNAi-CG9509	F	0.75	20	4
4	RNAi-CG9509	F	0.75	20	2
5	RNAi-CG9509	F	0.75	20	2
6	RNAi-CG9509	F	0.75	20	7
1	control	F	1	20	12
2	control	F	1	20	13
3	control	F	1	20	3
4	control	F	1	20	5
5	control	F	1	20	9
6	control	F	1	20	5
1	RNAi-CG9509	F	1	20	5
2	RNAi-CG9509	F	1	20	5
3	RNAi-CG9509	F	1	17	3
4	RNAi-CG9509	F	1	20	7
5	RNAi-CG9509	F	1	20	4
6	RNAi-CG9509	F	1	20	2
1	control	M	0	13	0
2	control	M	0.25	20	1
3	control	M	0.25	20	0
4	control	M	0.25	20	3
5	control	M	0.25	20	1
6	control	M	0.25	20	2
7	control	M	0.25	20	1
1	RNAi-CG9509	M	0.25	20	1
2	RNAi-CG9509	M	0.25	20	0
3	RNAi-CG9509	M	0.25	20	0
4	RNAi-CG9509	M	0.25	20	0
5	RNAi-CG9509	M	0.25	20	5
6	RNAi-CG9509	M	0.25	19	4
1	control	M	0.5	13	2
2	control	M	0.5	7	3
3	control	M	0.5	19	2
4	control	M	0.5	20	3
5	control	M	0.5	19	5
6	control	M	0.5	20	9
1	RNAi-CG9509	M	0.5	20	6
2	RNAi-CG9509	M	0.5	19	4
3	RNAi-CG9509	M	0.5	20	4
4	RNAi-CG9509	M	0.5	20	3
5	RNAi-CG9509	M	0.5	20	3
6	RNAi-CG9509	M	0.5	20	1
1	control	M	0.75	20	14
2	control	M	0.75	14	3
3	control	M	0.75	19	4
4	control	M	0.75	20	4
5	control	M	0.75	20	2
6	control	M	0.75	20	3
1	RNAi-CG9509	M	0.75	20	4
2	RNAi-CG9509	M	0.75	20	5
3	RNAi-CG9509	M	0.75	20	4
4	RNAi-CG9509	M	0.75	20	4
5	RNAi-CG9509	M	0.75	20	4
6	RNAi-CG9509	M	0.75	20	1
1	control	M	1	20	7
2	control	M	1	20	9
3	control	M	1	20	9
4	control	M	1	20	15
5	control	M	1	20	3
6	control	M	1	20	12
1	RNAi-CG9509	M	1	20	4
2	RNAi-CG9509	M	1	20	6
3	RNAi-CG9509	M	1	20	8
4	RNAi-CG9509	M	1	20	11
5	RNAi-CG9509	M	1	20	5
6	RNAi-CG9509	M	1	20	6

## Sheet: Fig S3B
Replicate	Strain	Sex	Malathion conc (µg/cm2)	Flies (start)	Mortality (30 mins)
1	control	F	0	7	0
1	control	M	0	14	0
1	RNAi-CG9509	F	0	17	0
1	RNAi-CG9509	M	0	18	0
1	control	F	0.1857	20	3
2	control	F	0.1857	20	4
3	control	F	0.1857	20	1
4	control	F	0.1857	20	2
5	control	F	0.1857	20	2
6	control	F	0.1857	20	2
1	control	M	0.1857	20	2
2	control	M	0.1857	20	5
3	control	M	0.1857	20	1
4	control	M	0.1857	20	4
5	control	M	0.1857	20	1
6	control	M	0.1857	20	1
1	RNAi-CG9509	F	0.1857	20	4
2	RNAi-CG9509	F	0.1857	20	4
3	RNAi-CG9509	F	0.1857	19	0
4	RNAi-CG9509	F	0.1857	20	0
5	RNAi-CG9509	F	0.1857	20	0
6	RNAi-CG9509	F	0.1857	20	0
1	RNAi-CG9509	M	0.1857	20	8
2	RNAi-CG9509	M	0.1857	20	4
3	RNAi-CG9509	M	0.1857	20	5
4	RNAi-CG9509	M	0.1857	20	3
5	RNAi-CG9509	M	0.1857	20	1
6	RNAi-CG9509	M	0.1857	20	1
1	control	F	0.375	20	4
2	control	F	0.375	20	0
3	control	F	0.375	20	1
4	control	F	0.375	20	2
5	control	F	0.375	20	5
6	control	F	0.375	20	1
1	control	M	0.375	20	1
2	control	M	0.375	20	5
3	control	M	0.375	20	0
4	control	M	0.375	20	6
5	control	M	0.375	20	6
6	control	M	0.375	20	7
1	RNAi-CG9509	F	0.375	20	2
2	RNAi-CG9509	F	0.375	20	1
3	RNAi-CG9509	F	0.375	20	0
4	RNAi-CG9509	F	0.375	20	1
5	RNAi-CG9509	F	0.375	20	0
6	RNAi-CG9509	F	0.375	20	3
1	RNAi-CG9509	M	0.375	20	5
2	RNAi-CG9509	M	0.375	20	4
3	RNAi-CG9509	M	0.375	20	5
4	RNAi-CG9509	M	0.375	20	5
5	RNAi-CG9509	M	0.375	20	0
6	RNAi-CG9509	M	0.375	20	3
1	control	F	0.75	20	2
2	control	F	0.75	20	0
3	control	F	0.75	20	5
4	control	F	0.75	20	5
5	control	F	0.75	20	9
6	control	F	0.75	20	7
1	control	M	0.75	20	8
2	control	M	0.75	18	18
3	control	M	0.75	20	12
4	control	M	0.75	20	14
5	control	M	0.75	20	10
6	control	M	0.75	20	13
1	RNAi-CG9509	F	0.75	20	0
2	RNAi-CG9509	F	0.75	20	3
3	RNAi-CG9509	F	0.75	20	5
4	RNAi-CG9509	F	0.75	20	0
5	RNAi-CG9509	F	0.75	20	5
6	RNAi-CG9509	F	0.75	20	2
1	RNAi-CG9509	M	0.75	20	1
2	RNAi-CG9509	M	0.75	20	5
3	RNAi-CG9509	M	0.75	20	10
4	RNAi-CG9509	M	0.75	20	5
5	RNAi-CG9509	M	0.75	19	15
6	RNAi-CG9509	M	0.75	20	14
1	control	F	0.9	20	16
2	control	F	0.9	20	8
3	control	F	0.9	20	19
4	control	F	0.9	20	16
5	control	F	0.9	20	14
6	control	F	0.9	20	19
1	control	M	0.9	19	16
2	control	M	0.9	20	20
3	control	M	0.9	20	17
4	control	M	0.9	20	16
5	control	M	0.9	19	18
6	control	M	0.9	20	16
1	RNAi-CG9509	F	0.9	20	6
2	RNAi-CG9509	F	0.9	20	4
3	RNAi-CG9509	F	0.9	20	8
4	RNAi-CG9509	F	0.9	20	6
5	RNAi-CG9509	F	0.9	20	8
6	RNAi-CG9509	F	0.9	20	4
1	RNAi-CG9509	M	0.9	20	5
2	RNAi-CG9509	M	0.9	20	10
3	RNAi-CG9509	M	0.9	20	7
4	RNAi-CG9509	M	0.9	19	4
5	RNAi-CG9509	M	0.9	20	16
6	RNAi-CG9509	M	0.9	20	15

## Sheet: Fig S3C
Replicate	Strain	Sex	Ethanol conc (%)	Flies (start)	Mortality (48 hours)
1	control	F	0	20	0
2	control	F	0	20	0
3	control	F	0	19	0
4	control	F	0	17	0
5	control	F	0	20	0
6	control	F	0	20	0
7	control	F	0	18	0
8	control	F	0	15	0
9	control	F	0	19	0
10	control	F	0	20	0
11	control	F	0	20	0
1	control	M	0	20	0
2	control	M	0	20	0
3	control	M	0	20	0
4	control	M	0	20	0
5	control	M	0	20	0
6	control	M	0	20	0
7	control	M	0	14	0
8	control	M	0	18	0
9	control	M	0	20	0
1	RNAi-CG9509	F	0	20	0
2	RNAi-CG9509	F	0	20	0
3	RNAi-CG9509	F	0	20	0
4	RNAi-CG9509	F	0	20	0
5	RNAi-CG9509	F	0	20	0
6	RNAi-CG9509	F	0	20	0
1	RNAi-CG9509	M	0	20	0
2	RNAi-CG9509	M	0	20	0
3	RNAi-CG9509	M	0	20	0
4	RNAi-CG9509	M	0	20	0
5	RNAi-CG9509	M	0	20	0
6	RNAi-CG9509	M	0	20	0
7	RNAi-CG9509	M	0	15	0
8	RNAi-CG9509	M	0	20	0
1	control	F	7	20	0
2	control	F	7	20	0
3	control	F	7	20	0
4	control	F	7	20	0
5	control	F	7	20	0
6	control	F	7	17	0
7	control	F	7	19	0
8	control	F	7	13	0
1	control	M	7	20	0
2	control	M	7	19	0
3	control	M	7	15	0
4	control	M	7	7	0
5	control	M	7	17	0
6	control	M	7	20	0
7	control	M	7	20	0
8	control	M	7	18	0
1	RNAi-CG9509	F	7	19	0
2	RNAi-CG9509	F	7	18	0
3	RNAi-CG9509	F	7	17	0
4	RNAi-CG9509	F	7	18	0
5	RNAi-CG9509	F	7	20	0
6	RNAi-CG9509	F	7	20	0
7	RNAi-CG9509	F	7	20	0
8	RNAi-CG9509	F	7	20	0
1	RNAi-CG9509	M	7	20	0
2	RNAi-CG9509	M	7	20	0
3	RNAi-CG9509	M	7	19	0
4	RNAi-CG9509	M	7	20	0
5	RNAi-CG9509	M	7	20	0
6	RNAi-CG9509	M	7	20	0
7	RNAi-CG9509	M	7	20	0
8	RNAi-CG9509	M	7	20	0
1	control	F	9	20	1
2	control	F	9	18	0
3	control	F	9	18	0
4	control	F	9	20	1
5	control	F	9	20	0
6	control	F	9	20	0
7	control	F	9	19	0
8	control	F	9	20	0
1	control	M	9	17	0
2	control	M	9	20	0
3	control	M	9	18	1
4	control	M	9	18	1
5	control	M	9	20	0
6	control	M	9	20	0
7	control	M	9	20	0
8	control	M	9	20	0
1	RNAi-CG9509	F	9	18	0
2	RNAi-CG9509	F	9	19	0
3	RNAi-CG9509	F	9	19	0
4	RNAi-CG9509	F	9	20	0
5	RNAi-CG9509	F	9	20	0
6	RNAi-CG9509	F	9	20	0
7	RNAi-CG9509	F	9	20	0
8	RNAi-CG9509	F	9	20	0
1	RNAi-CG9509	M	9	19	0
2	RNAi-CG9509	M	9	18	0
3	RNAi-CG9509	M	9	20	0
4	RNAi-CG9509	M	9	20	0
5	RNAi-CG9509	M	9	20	0
6	RNAi-CG9509	M	9	20	0
7	RNAi-CG9509	M	9	20	0
8	RNAi-CG9509	M	9	20	0
1	control	F	12	20	1
2	control	F	12	14	0
3	control	F	12	15	1
4	control	F	12	20	4
5	control	F	12	18	2
6	control	F	12	20	0
7	control	F	12	19	0
8	control	F	12	20	0
1	control	M	12	20	0
2	control	M	12	18	0
3	control	M	12	20	1
4	control	M	12	19	0
5	control	M	12	17	3
6	control	M	12	20	1
7	control	M	12	19	0
8	control	M	12	20	0
1	RNAi-CG9509	F	12	20	0
2	RNAi-CG9509	F	12	20	0
3	RNAi-CG9509	F	12	20	1
4	RNAi-CG9509	F	12	20	0
5	RNAi-CG9509	F	12	20	0
6	RNAi-CG9509	F	12	19	0
7	RNAi-CG9509	F	12	20	1
8	RNAi-CG9509	F	12	20	2
1	RNAi-CG9509	M	12	20	0
2	RNAi-CG9509	M	12	20	0
3	RNAi-CG9509	M	12	20	4
4	RNAi-CG9509	M	12	19	1
5	RNAi-CG9509	M	12	20	0
6	RNAi-CG9509	M	12	20	0
7	RNAi-CG9509	M	12	20	0
8	RNAi-CG9509	M	12	19	1
1	control	F	14	20	1
2	control	F	14	20	3
3	control	F	14	20	1
4	control	F	14	20	0
5	control	F	14	20	0
6	control	F	14	16	2
7	control	F	14	20	0
8	control	F	14	20	0
1	control	M	14	20	0
2	control	M	14	20	1
3	control	M	14	20	1
4	control	M	14	20	0
5	control	M	14	20	1
6	control	M	14	19	1
7	control	M	14	20	1
8	control	M	14	20	0
1	RNAi-CG9509	F	14	20	1
2	RNAi-CG9509	F	14	20	0
3	RNAi-CG9509	F	14	20	0
4	RNAi-CG9509	F	14	20	1
5	RNAi-CG9509	F	14	20	1
6	RNAi-CG9509	F	14	20	1
7	RNAi-CG9509	F	14	20	1
8	RNAi-CG9509	F	14	20	1
1	RNAi-CG9509	M	14	20	0
2	RNAi-CG9509	M	14	20	0
3	RNAi-CG9509	M	14	20	1
4	RNAi-CG9509	M	14	20	0
5	RNAi-CG9509	M	14	20	0
6	RNAi-CG9509	M	14	20	0
7	RNAi-CG9509	M	14	20	0
8	RNAi-CG9509	M	14	20	1
1	control	F	16	20	1
2	control	F	16	20	1
3	control	F	16	20	0
4	control	F	16	20	1
5	control	F	16	20	5
6	control	F	16	16	0
7	control	F	16	20	0
8	control	F	16	20	3
1	control	M	16	20	2
2	control	M	16	20	0
3	control	M	16	20	0
4	control	M	16	20	2
5	control	M	16	20	3
6	control	M	16	20	3
7	control	M	16	19	3
8	control	M	16	20	2
1	RNAi-CG9509	F	16	20	4
2	RNAi-CG9509	F	16	20	2
3	RNAi-CG9509	F	16	20	1
4	RNAi-CG9509	F	16	20	4
5	RNAi-CG9509	F	16	20	0
6	RNAi-CG9509	F	16	20	2
7	RNAi-CG9509	F	16	20	1
8	RNAi-CG9509	F	16	20	1
1	RNAi-CG9509	M	16	20	0
2	RNAi-CG9509	M	16	20	2
3	RNAi-CG9509	M	16	20	7
4	RNAi-CG9509	M	16	20	1
5	RNAi-CG9509	M	16	20	0
6	RNAi-CG9509	M	16	20	1
7	RNAi-CG9509	M	16	19	2
8	RNAi-CG9509	M	16	20	1
1	control	F	18	20	10
2	control	F	18	20	6
3	control	F	18	19	4
4	control	F	18	20	5
5	control	F	18	20	1
6	control	F	18	20	0
7	control	F	18	20	4
8	control	F	18	18	2
1	control	M	18	20	0
2	control	M	18	20	3
3	control	M	18	20	3
4	control	M	18	20	5
5	control	M	18	20	2
6	control	M	18	20	1
7	control	M	18	20	4
8	control	M	18	20	6
1	RNAi-CG9509	F	18	20	6
2	RNAi-CG9509	F	18	20	2
3	RNAi-CG9509	F	18	20	4
4	RNAi-CG9509	F	18	20	15
5	RNAi-CG9509	F	18	20	4
6	RNAi-CG9509	F	18	20	1
7	RNAi-CG9509	F	18	20	1
8	RNAi-CG9509	F	18	20	4
1	RNAi-CG9509	M	18	20	4
2	RNAi-CG9509	M	18	20	7
3	RNAi-CG9509	M	18	20	2
4	RNAi-CG9509	M	18	20	3
5	RNAi-CG9509	M	18	20	9
6	RNAi-CG9509	M	18	20	3
7	RNAi-CG9509	M	18	20	3
8	RNAi-CG9509	M	18	20	4

## Sheet: Fig S3D
Replicate	Strain	Sex	Vial mean recovery time (mins)
1	RNAi-CG9509	F	14
2	RNAi-CG9509	F	16.8
3	RNAi-CG9509	F	16.2
4	RNAi-CG9509	F	13.8
5	RNAi-CG9509	F	13.6
6	RNAi-CG9509	F	13.2
7	RNAi-CG9509	F	13.4
8	RNAi-CG9509	F	13
9	RNAi-CG9509	F	12.8
10	RNAi-CG9509	F	12.8
11	RNAi-CG9509	F	16.8
12	RNAi-CG9509	F	14.2
13	RNAi-CG9509	F	12.8
14	RNAi-CG9509	F	18.4
15	RNAi-CG9509	F	13.2
16	RNAi-CG9509	F	13.4
17	RNAi-CG9509	F	13.4
18	RNAi-CG9509	F	13.6
19	RNAi-CG9509	F	13.5
20	RNAi-CG9509	F	12.75
21	RNAi-CG9509	F	16.6
22	RNAi-CG9509	F	15
23	RNAi-CG9509	F	15.2
24	RNAi-CG9509	F	14.4
25	RNAi-CG9509	F	15
1	RNAi-CG9509	M	21.5
2	RNAi-CG9509	M	24
3	RNAi-CG9509	M	17.2
4	RNAi-CG9509	M	19.4
5	RNAi-CG9509	M	17.2
6	RNAi-CG9509	M	18.4
7	RNAi-CG9509	M	16.8
8	RNAi-CG9509	M	16.4
9	RNAi-CG9509	M	18.2
10	RNAi-CG9509	M	17.4
11	RNAi-CG9509	M	19
12	RNAi-CG9509	M	18.75
13	RNAi-CG9509	M	18.6
14	RNAi-CG9509	M	16.8
15	RNAi-CG9509	M	16.6
16	RNAi-CG9509	M	19.5
17	RNAi-CG9509	M	18.6
18	RNAi-CG9509	M	17.4
19	RNAi-CG9509	M	17.6
20	RNAi-CG9509	M	20
21	RNAi-CG9509	M	17.8
22	RNAi-CG9509	M	19.6
23	RNAi-CG9509	M	18
24	RNAi-CG9509	M	18.2
25	RNAi-CG9509	M	17
1	control	F	19.2
2	control	F	17.2
3	control	F	17.4
4	control	F	16
5	control	F	14
6	control	F	14.8
7	control	F	13.4
8	control	F	13
9	control	F	15.8
10	control	F	17.4
11	control	F	18.2
12	control	F	16.4
13	control	F	18.6
14	control	F	15.2
15	control	F	12.8
16	control	F	16
17	control	F	19.2
18	control	F	15.2
19	control	F	17.4
20	control	F	15
21	control	F	16.6
22	control	F	13.6
23	control	F	13.4
24	control	F	14.4
25	control	F	12.6
1	control	M	17.4
2	control	M	17.2
3	control	M	17.2
4	control	M	20.4
5	control	M	17
6	control	M	23.2
7	control	M	20.2
8	control	M	19.8
9	control	M	20
10	control	M	19.2
11	control	M	17.8
12	control	M	18.8
13	control	M	21.6
14	control	M	21.8
15	control	M	21.6
16	control	M	19.4
17	control	M	20
18	control	M	17.8
19	control	M	19
20	control	M	17.4
21	control	M	16.75
22	control	M	16.8
23	control	M	15.6
24	control	M	21
25	control	M	18

## Sheet: Fig S4A 
Strain	Replicate	Time to pupariation (hours)
RNAi-CG9509	1	115
RNAi-CG9509	2	119.25
RNAi-CG9509	3	119.25
RNAi-CG9509	4	121.25
RNAi-CG9509	5	119.25
RNAi-CG9509	6	119.25
RNAi-CG9509	7	121.25
RNAi-CG9509	8	119.25
RNAi-CG9509	9	121.25
RNAi-CG9509	10	119.25
RNAi-CG9509	11	121.25
RNAi-CG9509	12	134
RNAi-CG9509	13	119.25
RNAi-CG9509	14	119.25
RNAi-CG9509	15	134
RNAi-CG9509	16	119.25
RNAi-CG9509	17	121.25
RNAi-CG9509	18	119.25
RNAi-CG9509	19	119.25
RNAi-CG9509	20	119.25
RNAi-CG9509	21	121.25
RNAi-CG9509	22	112.25
RNAi-CG9509	23	119.25
RNAi-CG9509	24	119.25
RNAi-CG9509	25	121.25
RNAi-CG9509	26	117.25
RNAi-CG9509	27	121.25
RNAi-CG9509	28	134
RNAi-CG9509	29	117.25
RNAi-CG9509	30	119.25
RNAi-CG9509	31	117.25
RNAi-CG9509	32	117.25
RNAi-CG9509	33	134
RNAi-CG9509	34	121.25
RNAi-CG9509	35	121.25
RNAi-CG9509	36	121.25
RNAi-CG9509	37	117.25
RNAi-CG9509	38	119.5
RNAi-CG9509	39	134
RNAi-CG9509	40	134
RNAi-CG9509	41	119.25
RNAi-CG9509	42	121.25
RNAi-CG9509	43	136.5
RNAi-CG9509	44	136.5
RNAi-CG9509	45	119.5
RNAi-CG9509	46	134
RNAi-CG9509	47	134
RNAi-CG9509	48	121.25
RNAi-CG9509	49	134
RNAi-CG9509	50	112.25
RNAi-CG9509	51	134
control	1	110.5
control	2	134
control	3	119.25
control	4	134
control	5	121.25
control	6	140.25
control	7	119.25
control	8	119.25
control	9	121.25
control	10	112.25
control	11	117.25
control	12	134
control	13	119.25
control	14	121.25
control	15	134
control	16	141
control	17	119.25
control	18	121.25
control	19	119.25
control	20	136.5
control	21	121.25
control	22	121.25
control	23	117.25
control	24	121.25
control	25	134

## Sheet: Fig S4B
Strain	Replicate	Time to pupariation (hours)
MU10	1	122.25
MU10	2	124
MU10	3	124
MU10	4	124
MU10	5	124
MU10	6	126
MU10	7	126
MU10	8	126
MU10	9	126
MU10	10	126
MU10	11	126
MU10	12	126
MU10	13	126
MU10	14	126
MU10	15	126
MU10	16	126
MU10	17	126
MU10	18	126
MU10	19	126
MU10	20	126
MU10	21	126
MU10	22	127.5
MU10	23	127.5
MU10	24	127.5
MU10	25	127.5
MU10	26	127.5
MU10	27	127.5
MU10	28	127.5
MU10	29	127.5
MU10	30	127.5
MU10	31	127.5
MU10	32	127.5
MU10	33	127.5
MU10	34	127.5
MU10	35	127.5
MU10	36	127.5
MU10	37	127.5
MU10	38	129.5
MU10	39	129.5
MU10	40	129.5
MU10	41	129.5
MU10	42	129.5
MU10	43	129.5
MU10	44	129.5
MU10	45	129.5
MU10	46	129.5
MU10	47	129.5
MU10	48	129.5
MU10	49	129.5
MU10	50	129.5
MU10	51	129.5
MU10	52	129.5
MU10	53	129.5
MU10	54	129.5
MU10	55	129.5
MU10	56	129.5
MU10	57	129.5
MU10	58	129.5
MU10	59	129.5
MU10	60	129.5
MU10	61	129.5
MU10	62	129.5
MU10	63	129.5
MU10	64	129.5
MU10	65	129.5
MU10	66	129.5
MU10	67	129.5
MU10	68	129.5
MU10	69	129.5
MU10	70	129.5
MU10	71	129.5
MU10	72	129.5
MU12	1	120
MU12	2	120
MU12	3	120
MU12	4	120
MU12	5	122.25
MU12	6	122.25
MU12	7	122.25
MU12	8	122.25
MU12	9	122.25
MU12	10	124
MU12	11	124
MU12	12	124
MU12	13	124
MU12	14	124
MU12	15	124
MU12	16	124
MU12	17	124
MU12	18	124
MU12	19	124
MU12	20	126
MU12	21	126
MU12	22	126
MU12	23	126
MU12	24	126
MU12	25	126
MU12	26	126
MU12	27	126
MU12	28	126
MU12	29	126
MU12	30	126
MU12	31	126
MU12	32	126
MU12	33	126
MU12	34	126
MU12	35	126
MU12	36	126
MU12	37	126
MU12	38	126
MU12	39	127.5
MU12	40	127.5
MU12	41	127.5
MU12	42	127.5
MU12	43	127.5
MU12	44	127.5
MU12	45	127.5
MU12	46	127.5
MU12	47	127.5
MU12	48	127.5
MU12	49	127.5
MU12	50	127.5
MU12	51	127.5
MU12	52	127.5
MU12	53	127.5
MU12	54	127.5
MU12	55	129.5
MU12	56	129.5
MU12	57	129.5
MU12	58	129.5
MU12	59	129.5
MU12	60	129.5
MU12	61	129.5
MU12	62	129.5
MU12	63	129.5
MU12	64	129.5
MU12	65	129.5
MU12	66	129.5
MU12	67	129.5
MU12	68	129.5
MU12	69	129.5
MU12	70	129.5
MU12	71	129.5
MU12	72	129.5
MU12	73	129.5
MU12	74	129.5
CG9509del	1	124
CG9509del	2	124
CG9509del	3	124
CG9509del	4	124
CG9509del	5	124
CG9509del	6	124
CG9509del	7	124
CG9509del	8	124
CG9509del	9	124
CG9509del	10	124
CG9509del	11	124
CG9509del	12	124
CG9509del	13	124
CG9509del	14	124
CG9509del	15	124
CG9509del	16	124
CG9509del	17	124
CG9509del	18	124
CG9509del	19	124
CG9509del	20	124
CG9509del	21	124
CG9509del	22	124
CG9509del	23	124
CG9509del	24	124
CG9509del	25	124
CG9509del	26	124
CG9509del	27	124
CG9509del	28	124
CG9509del	29	124
CG9509del	30	124
CG9509del	31	126
CG9509del	32	126
CG9509del	33	126
CG9509del	34	126
CG9509del	35	126
CG9509del	36	126
CG9509del	37	126
CG9509del	38	126
CG9509del	39	126
CG9509del	40	126
CG9509del	41	126
CG9509del	42	126
CG9509del	43	126
CG9509del	44	126
CG9509del	45	126
CG9509del	46	127.5
CG9509del	47	127.5
CG9509del	48	127.5
CG9509del	49	127.5
CG9509del	50	127.5
CG9509del	51	127.5
CG9509del	52	127.5
CG9509del	53	127.5
CG9509del	54	127.5
CG9509del	55	127.5
CG9509del	56	127.5
CG9509del	57	127.5
CG9509del	58	127.5
CG9509del	59	127.5
CG9509del	60	127.5
CG9509del	61	127.5
CG9509del	62	127.5
CG9509del	63	127.5
CG9509del	64	127.5
CG9509del	65	127.5
CG9509del	66	127.5
CG9509del	67	127.5
CG9509del	68	127.5
CG9509del	69	127.5
CG9509del	70	127.5
CG9509del	71	127.5
CG9509del	72	129.5
CG9509del	73	129.5
CG9509del	74	129.5
CG9509del	75	129.5
CG9509del	76	129.5
CG9509del	77	129.5
CG9509del	78	129.5
CG9509del	79	129.5
CG9509del	80	129.5
CG9509del	81	129.5
CG9509del	82	129.5
CG9509del	83	129.5
CG9509del	84	129.5
CG9509del	85	129.5
CG9509del	86	129.5
CG9509del	87	129.5
CG9509del	88	129.5
CG9509del	89	129.5
CG9509del	90	129.5
CG9509del	91	129.5
CG9509del	92	129.5
CG9509del	93	129.5
CG9509del	94	129.5
CG9509del	95	129.5
CG9509del	96	129.5
CG9509del	97	129.5
CG9509del	98	129.5
CG9509del	99	129.5
CG9509del	100	129.5
CG9509del	101	129.5
CG9509del	102	129.5
CG9509del	103	129.5
CG9509del	104	129.5
CG9509del	105	129.5
CG9509del	106	129.5
CG9509del	107	129.5
MU17	1	124
MU17	2	124
MU17	3	124
MU17	4	124
MU17	5	124
MU17	6	126
MU17	7	126
MU17	8	126
MU17	9	126
MU17	10	127.5
MU17	11	127.5
MU17	12	127.5
MU17	13	127.5
MU17	14	127.5
MU17	15	127.5
MU17	16	127.5
MU17	17	127.5
MU17	18	129.5
MU17	19	129.5
MU17	20	129.5
MU17	21	129.5
MU17	22	129.5
MU17	23	129.5
MU17	24	129.5
MU17	25	129.5
MU17	26	129.5
MU17	27	129.5
MU17	28	129.5
MU17	29	129.5
MU17	30	129.5
MU17	31	129.5
MU17	32	129.5
MU17	33	129.5
MU17	34	129.5
MU26	1	122.25
MU26	2	122.25
MU26	3	124
MU26	4	124
MU26	5	124
MU26	6	124
MU26	7	124
MU26	8	124
MU26	9	124
MU26	10	124
MU26	11	124
MU26	12	124
MU26	13	124
MU26	14	124
MU26	15	124
MU26	16	124
MU26	17	124
MU26	18	124
MU26	19	124
MU26	20	124
MU26	21	124
MU26	22	124
MU26	23	124
MU26	24	124
MU26	25	124
MU26	26	126
MU26	27	126
MU26	28	126
MU26	29	126
MU26	30	126
MU26	31	126
MU26	32	126
MU26	33	126
MU26	34	126
MU26	35	126
MU26	36	126
MU26	37	126
MU26	38	126
MU26	39	126
MU26	40	126
MU26	41	126
MU26	42	126
MU26	43	126
MU26	44	126
MU26	45	129.5
MU26	46	129.5
MU26	47	129.5
MU26	48	129.5
MU26	49	129.5
MU26	50	129.5
MU26	51	129.5
MU26	52	129.5
MU26	53	129.5
MU26	54	129.5
MU26	55	129.5
MU26	56	129.5
MU26	57	129.5
MU26	58	129.5
MU26	59	129.5
MU26	60	129.5
MU26	61	129.5
MU26	62	129.5

## Sheet: Fig S4C
Strain	Replicate	Duration wandering (hours)
RNAi-CG9509	1	4.5
RNAi-CG9509	2	8.75
RNAi-CG9509	3	8.75
RNAi-CG9509	4	10.75
RNAi-CG9509	5	8.75
RNAi-CG9509	6	8.75
RNAi-CG9509	7	10.75
RNAi-CG9509	8	8.75
RNAi-CG9509	9	10.75
RNAi-CG9509	10	4.25
RNAi-CG9509	11	10.75
RNAi-CG9509	12	8.75
RNAi-CG9509	13	6.75
RNAi-CG9509	14	4.25
RNAi-CG9509	15	6.25
RNAi-CG9509	16	8.75
RNAi-CG9509	17	4.25
RNAi-CG9509	18	10.75
RNAi-CG9509	19	9
RNAi-CG9509	20	9
RNAi-CG9509	21	11
RNAi-CG9509	22	9.75
RNAi-CG9509	23	9
RNAi-CG9509	24	11
RNAi-CG9509	25	7
RNAi-CG9509	26	4
RNAi-CG9509	27	7
RNAi-CG9509	28	7
RNAi-CG9509	29	9
RNAi-CG9509	30	7
RNAi-CG9509	31	7
RNAi-CG9509	32	11
RNAi-CG9509	33	9
RNAi-CG9509	34	11
RNAi-CG9509	35	5
RNAi-CG9509	36	9.25
RNAi-CG9509	37	10
RNAi-CG9509	38	9.25
RNAi-CG9509	39	9
RNAi-CG9509	40	9.75
control	1	8.75
control	2	8.75
control	3	8.75
control	4	8.75
control	5	8.75
control	6	8.75
control	7	10.75
control	8	8.75
control	9	10.25
control	10	5
control	11	9
control	12	11
control	13	4.5
control	14	4
control	15	7
control	16	9

## Sheet: Fig S4D
Strain	Replicate	Duration wandering (hours)
CG9509del	1	6
CG9509del	2	11
CG9509del	3	8.25
CG9509del	4	9.3
CG9509del	5	6
CG9509del	6	10
CG9509del	7	7.25
CG9509del	8	7.25
CG9509del	9	7.25
CG9509del	10	6.75
MU12	1	9.3
MU12	2	9.3
MU12	3	3.5
MU12	4	8.25
MU12	5	9.3
MU12	6	9.3
MU12	7	9.3
MU12	8	9.3
MU12	9	9.3
MU12	10	8.25
MU10	1	7.8
MU10	2	4.667
MU10	3	4.667
MU10	4	5
MU10	5	2.167
MU10	6	5
MU10	7	5
MU10	8	6.9167
MU10	9	5
MU10	10	4.7497
MU17	1	5
MU17	2	10
MU17	3	7.3
MU17	4	8.5
MU17	5	9.5
MU17	6	7.5
MU17	7	7.5
MU17	8	9.5
MU17	9	6
MU17	10	9.5
MU26	1	6.3
MU26	2	9.3
MU26	3	9.3
MU26	4	6.3
MU26	5	6.3
MU26	6	8.167
MU26	7	9.3
MU26	8	9.3
MU26	9	-8
MU26	10	6.3

## Sheet: Figs S5A,B and S7G,H
Strain	Sex	SNP67	Replicate	Weight 25 flies (g)
ZI 357	F	C	1	0.02705
ZI 357	F	C	2	0.0268
ZI 357	F	C	3	0.02524
ZI 357	F	C	4	0.02352
ZI 357	M	C	1	0.01895
ZI 357	M	C	2	0.01871
ZI 357	M	C	3	0.01695
ZI 357	M	C	4	0.01874
ZI 197	F	C	1	0.02924
ZI 197	F	C	2	0.02655
ZI 197	F	C	3	0.02622
ZI 197	F	C	4	0.02154
ZI 197	M	C	1	0.01976
ZI 197	M	C	2	0.01807
ZI 197	M	C	3	0.01866
ZI 197	M	C	4	0.01772
ZI 254	F	C	1	0.02483
ZI 254	F	C	2	0.02743
ZI 254	F	C	3	0.02708
ZI 254	F	C	4	0.02797
ZI 254	M	C	1	0.01824
ZI 254	M	C	2	0.01782
ZI 254	M	C	3	0.01716
ZI 254	M	C	4	0.01751
ZI 216	F	C	1	0.02268
ZI 216	F	C	2	0.02186
ZI 216	F	C	3	0.02151
ZI 216	F	C	4	0.02126
ZI 216	M	C	1	0.01779
ZI 216	M	C	2	0.01701
ZI 216	M	C	3	0.01669
ZI 216	M	C	4	0.01677
ZI 418	F	C	1	0.02503
ZI 418	F	C	2	0.02509
ZI 418	F	C	3	0.02358
ZI 418	F	C	4	0.02478
ZI 418	M	C	1	0.01731
ZI 418	M	C	2	0.01877
ZI 418	M	C	3	0.01699
ZI 418	M	C	4	0.01837
ZI 273	F	C	1	0.03036
ZI 273	F	C	2	0.03055
ZI 273	F	C	3	0.02797
ZI 273	F	C	4	0.03165
ZI 273	M	C	1	0.01899
ZI 273	M	C	2	0.01904
ZI 273	M	C	3	0.01886
ZI 273	M	C	4	0.01953
ZI 112	F	C	1	0.02877
ZI 112	F	C	2	0.02923
ZI 112	F	C	3	0.02843
ZI 112	F	C	4	0.02885
ZI 112	M	C	1	0.01991
ZI 112	M	C	2	0.02034
ZI 112	M	C	3	0.01916
ZI 112	M	C	4	0.01925
ZI 251	F	C	1	0.02206
ZI 251	F	C	2	0.02446
ZI 251	F	C	3	0.02402
ZI 251	F	C	4	0.02141
ZI 251	M	C	1	0.01573
ZI 251	M	C	2	0.01722
ZI 251	M	C	3	0.01578
ZI 251	M	C	4	0.01634
ZI 31	F	C	1	0.02494
ZI 31	F	C	2	0.02341
ZI 31	F	C	3	0.02309
ZI 31	F	C	4	0.02169
ZI 31	M	C	1	0.01661
ZI 31	M	C	2	0.01601
ZI 31	M	C	3	0.01626
ZI 31	M	C	4	0.01636
ZI 134	F	C	1	0.0255
ZI 134	F	C	2	0.02449
ZI 134	F	C	3	0.02393
ZI 134	F	C	4	0.02697
ZI 134	M	C	1	0.01772
ZI 134	M	C	2	0.01681
ZI 134	M	C	3	0.01727
ZI 134	M	C	4	0.01684
NL16	F	C	1	0.02638
NL16	F	C	2	0.0243
NL16	F	C	3	0.02566
NL16	F	C	4	0.02496
NL16	M	C	1	0.02012
NL16	M	C	2	0.01937
NL16	M	C	3	0.01908
NL16	M	C	4	0.02038
NL17	F	C	1	0.02353
NL17	F	C	2	0.02457
NL17	F	C	3	0.02469
NL17	F	C	4	0.02453
NL17	M	C	1	0.01811
NL17	M	C	2	0.0181
NL17	M	C	3	0.01817
NL17	M	C	4	0.01954
NL19	F	C	1	0.0253
NL19	F	C	2	0.02518
NL19	F	C	3	0.02477
NL19	F	C	4	0.0229
NL19	M	C	1	0.01865
NL19	M	C	2	0.01863
NL19	M	C	3	0.01864
NL19	M	C	4	0.0188
NL12	F	G	1	0.02659
NL12	F	G	2	0.02791
NL12	F	G	3	0.02628
NL12	F	G	4	0.0281
NL12	M	G	1	0.01909
NL12	M	G	2	0.01932
NL12	M	G	3	0.01876
NL12	M	G	4	0.01927
NL11	F	C	1	0.02657
NL11	F	C	2	0.02694
NL11	F	C	3	0.02768
NL11	F	C	4	0.02762
NL11	M	C	1	0.01842
NL11	M	C	2	0.01839
NL11	M	C	3	0.01809
NL11	M	C	4	0.01811
NL14	F	C	1	0.02814
NL14	F	C	2	0.02881
NL14	F	C	3	0.02797
NL14	F	C	4	0.02821
NL14	M	C	1	0.02003
NL14	M	C	2	0.01894
NL14	M	C	3	0.0192
NL14	M	C	4	0.01968
NL13	F	C	1	0.0256
NL13	F	C	2	0.0266
NL13	F	C	3	0.02587
NL13	F	C	4	0.02469
NL13	M	C	1	0.01733
NL13	M	C	2	0.01707
NL13	M	C	3	0.01646
NL13	M	C	4	0.0165
NL18	F	G	1	0.02575
NL18	F	G	2	0.02622
NL18	F	G	3	0.02591
NL18	F	G	4	0.02658
NL18	M	G	1	0.0178
NL18	M	G	2	0.01742
NL18	M	G	3	0.01769
NL18	M	G	4	0.01744
NL01	F	G	1	0.02063
NL01	F	G	2	0.0204
NL01	F	G	3	0.02049
NL01	F	G	4	0.02059
NL01	M	G	1	0.01441
NL01	M	G	2	0.01457
NL01	M	G	3	0.01535
NL01	M	G	4	0.01624
NL20	F	G	1	0.02677
NL20	F	G	2	0.02744
NL20	F	G	3	0.02814
NL20	F	G	4	0.02765
NL20	M	G	1	0.01881
NL20	M	G	2	0.01766
NL20	M	G	3	0.01779
NL20	M	G	4	0.01837
NL15	F	G	1	0.02358
NL15	F	G	2	0.0234
NL15	F	G	3	0.02366
NL15	F	G	4	0.02352
NL15	M	G	1	0.01619
NL15	M	G	2	0.01608
NL15	M	G	3	0.01591
NL15	M	G	4	0.01591
NL02	F	G	1	0.02588
NL02	F	G	2	0.02568
NL02	F	G	3	0.02579
NL02	F	G	4	0.02597
NL02	M	G	1	0.0177
NL02	M	G	2	0.01752
NL02	M	G	3	0.018
NL02	M	G	4	0.01782

## Sheet: Figs S5C,D and S7E,F
Strain	Sex	SNP67	Replicate	Length (mm)
NL01	F	G	1	1.995
NL01	F	G	2	1.938
NL01	F	G	3	1.927
NL01	F	G	4	1.95
NL01	F	G	5	1.956
NL01	M	G	1	1.532
NL01	M	G	2	1.7
NL01	M	G	3	1.62
NL01	M	G	4	1.864
NL01	M	G	5	1.731
NL02	F	G	1	2.081
NL02	F	G	2	2.067
NL02	F	G	3	2.116
NL02	F	G	4	2.071
NL02	F	G	5	2.139
NL02	M	G	1	1.892
NL02	M	G	2	1.821
NL02	M	G	3	1.84
NL02	M	G	4	1.846
NL02	M	G	5	1.795
NL12	F	G	1	2.16
NL12	F	G	2	2.217
NL12	F	G	3	2.103
NL12	F	G	4	2.128
NL12	F	G	5	2.164
NL12	M	G	1	1.99
NL12	M	G	2	1.86
NL12	M	G	3	1.924
NL12	M	G	4	1.817
NL12	M	G	5	1.865
NL15	F	G	1	1.998
NL15	F	G	2	2.016
NL15	F	G	3	2.007
NL15	F	G	4	1.935
NL15	F	G	5	2.008
NL15	M	G	1	1.691
NL15	M	G	2	1.677
NL15	M	G	3	1.644
NL15	M	G	4	1.672
NL15	M	G	5	1.695
NL18	F	G	1	2.085
NL18	F	G	2	2.137
NL18	F	G	3	2.081
NL18	F	G	4	2.061
NL18	F	G	5	2.1
NL18	M	G	1	1.876
NL18	M	G	2	1.923
NL18	M	G	3	1.812
NL18	M	G	4	1.846
NL18	M	G	5	1.822
NL20	F	G	1	2.009
NL20	F	G	2	2.093
NL20	F	G	3	2.095
NL20	F	G	4	2.063
NL20	F	G	5	2.067
NL20	M	G	1	1.786
NL20	M	G	2	1.859
NL20	M	G	3	1.774
NL20	M	G	4	1.772
NL20	M	G	5	1.782
NL11	F	C	1	2.098
NL11	F	C	2	2.24
NL11	F	C	3	2.268
NL11	F	C	4	2.27
NL11	F	C	5	2.192
NL11	M	C	1	1.933
NL11	M	C	2	1.826
NL11	M	C	3	1.915
NL11	M	C	4	1.9
NL11	M	C	5	1.932
NL13	F	C	1	2.009
NL13	F	C	2	2.005
NL13	F	C	3	2.066
NL13	F	C	4	1.995
NL13	F	C	5	1.953
NL13	M	C	1	1.648
NL13	M	C	2	1.623
NL13	M	C	3	1.69
NL13	M	C	4	1.681
NL13	M	C	5	1.79
NL14	F	C	1	2.192
NL14	F	C	2	2.169
NL14	F	C	3	2.192
NL14	F	C	4	2.099
NL14	F	C	5	2.183
NL14	M	C	1	1.933
NL14	M	C	2	1.834
NL14	M	C	3	1.869
NL14	M	C	4	1.744
NL14	M	C	5	1.856
NL16	F	C	1	2.168
NL16	F	C	2	2.185
NL16	F	C	3	2.229
NL16	F	C	4	2.056
NL16	F	C	5	2.135
NL16	M	C	1	1.831
NL16	M	C	2	1.8
NL16	M	C	3	1.878
NL16	M	C	4	1.898
NL16	M	C	5	1.865
NL17	F	C	1	2.204
NL17	F	C	2	2.197
NL17	F	C	3	2.173
NL17	F	C	4	2.188
NL17	F	C	5	2.116
NL17	M	C	1	1.873
NL17	M	C	2	1.847
NL17	M	C	3	1.897
NL17	M	C	4	1.91
NL17	M	C	5	1.993
NL19	F	C	1	2.142
NL19	F	C	2	2.19
NL19	F	C	3	2.179
NL19	F	C	4	2.203
NL19	F	C	5	2.141
NL19	M	C	1	1.92
NL19	M	C	2	1.942
NL19	M	C	3	1.932
NL19	M	C	4	1.929
NL19	M	C	5	1.91
ZI31	F	C	1	1.91
ZI31	F	C	2	1.972
ZI31	F	C	3	2.018
ZI31	F	C	4	1.996
ZI31	F	C	5	1.95
ZI31	M	C	1	1.737
ZI31	M	C	2	1.788
ZI31	M	C	3	1.705
ZI31	M	C	4	1.694
ZI31	M	C	5	1.653
ZI112	F	C	1	2.201
ZI112	F	C	2	2.213
ZI112	F	C	3	2.192
ZI112	F	C	4	2.182
ZI112	F	C	5	2.189
ZI112	M	C	1	1.908
ZI112	M	C	2	1.88
ZI112	M	C	3	1.855
ZI112	M	C	4	1.844
ZI112	M	C	5	1.782
ZI134	F	C	1	1.976
ZI134	F	C	2	2.022
ZI134	F	C	3	2.076
ZI134	F	C	4	2.073
ZI134	F	C	5	2.112
ZI134	M	C	1	1.784
ZI134	M	C	2	1.657
ZI134	M	C	3	1.81
ZI134	M	C	4	1.694
ZI134	M	C	5	1.696
ZI197	F	C	1	2.027
ZI197	F	C	2	1.958
ZI197	F	C	3	2.13
ZI197	F	C	4	1.941
ZI197	F	C	5	2.041
ZI197	M	C	1	1.741
ZI197	M	C	2	1.75
ZI197	M	C	3	1.751
ZI197	M	C	4	1.765
ZI197	M	C	5	1.779
ZI216	F	C	1	1.924
ZI216	F	C	2	2.049
ZI216	F	C	3	1.902
ZI216	F	C	4	1.998
ZI216	F	C	5	1.999
ZI216	M	C	1	1.807
ZI216	M	C	2	1.782
ZI216	M	C	3	1.831
ZI216	M	C	4	1.761
ZI216	M	C	5	1.728
ZI251	F	C	1	1.945
ZI251	F	C	2	1.931
ZI251	F	C	3	1.958
ZI251	F	C	4	1.955
ZI251	F	C	5	2.074
ZI251	M	C	1	1.739
ZI251	M	C	2	1.754
ZI251	M	C	3	1.695
ZI251	M	C	4	1.713
ZI251	M	C	5	1.757
ZI254	F	C	1	1.982
ZI254	F	C	2	2.033
ZI254	F	C	3	1.927
ZI254	F	C	4	1.84
ZI254	F	C	5	2.04
ZI254	M	C	1	1.76
ZI254	M	C	2	1.737
ZI254	M	C	3	1.755
ZI254	M	C	4	1.656
ZI254	M	C	5	1.681
ZI273	F	C	1	2.164
ZI273	F	C	2	2.033
ZI273	F	C	3	2.228
ZI273	F	C	4	2.249
ZI273	F	C	5	2.17
ZI273	M	C	1	1.976
ZI273	M	C	2	1.974
ZI273	M	C	3	1.94
ZI273	M	C	4	1.924
ZI273	M	C	5	1.973
ZI357	F	C	1	2.089
ZI357	F	C	2	2.033
ZI357	F	C	3	2.151
ZI357	F	C	4	2.005
ZI357	F	C	5	1.952
ZI357	M	C	1	1.771
ZI357	M	C	2	1.71
ZI357	M	C	3	1.729
ZI357	M	C	4	1.851
ZI357	M	C	5	1.746
ZI418	F	C	1	1.966
ZI418	F	C	2	2
ZI418	F	C	3	1.936
ZI418	F	C	4	1.909
ZI418	F	C	5	1.981
ZI418	M	C	1	1.719
ZI418	M	C	2	1.703
ZI418	M	C	3	1.846
ZI418	M	C	4	1.801
ZI418	M	C	5	1.776

[truncated: 2 more sheets: Figs S5E,F and S7C,D, Figs S6A,B,C,D]
